# Supplementary material
Source: HighWire-hosted journal article supplement (https://erj.ersjournals.com/content/55/5/2000959)
Supplement: inline-supplementary-material-1 [file inline-supplementary-material-1.pdf]

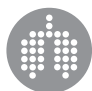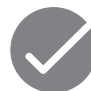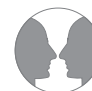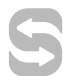

SHAREABLE PDF

# Cancer in the time of COVID-19: expert opinion on how to adapt current practice

Jo Raskin<sup>1</sup>, Marnix Lebeer<sup>1</sup>, Charlotte De Bondt<sup>1</sup>, Reinier Wener<sup>1</sup>,  
Annelies Janssens<sup>1,2</sup> and Jan P. van Meerbeeck<sup>1,2</sup>

**Affiliations:** <sup>1</sup>Dept of Pulmonology and Thoracic Oncology, Antwerp University Hospital, Edegem, Belgium.  
<sup>2</sup>Antwerp University, Antwerp, Belgium.

**Correspondence:** Jo Raskin, UZA, Respiratory Diseases, Wilrijkstraat 10, Edegem 2650, Belgium. E-mail: jo.raskin@uza.be

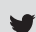

@ERSpublications

**Our current thoracic oncology practice could/should be adapted to the COVID-19 pandemic by reducing time in hospital and patient contacts with healthcare workers, whilst maintaining quality of care. This letter offers expert advice on how to do so.** <https://bit.ly/2JR2IoT>

**Cite this article as:** Raskin J, Lebeer M, De Bondt C, *et al.* Cancer in the time of COVID-19: expert opinion on how to adapt current practice. *Eur Respir J* 2020; 55: 2000959 [<https://doi.org/10.1183/13993003.00959-2020>].

This single-page version can be shared freely online.

## *To the Editor:*

The susceptibility of cancer patients to the adverse outcomes of viral infections is well known from past experiences: influenza increases the risk of hospital admission with respiratory distress four times, and the risk of death 10 times, compared with patients without cancer [1]. This risk is particularly elevated in patients with neutropenia or lymphopenia, which is often the case in patients treated with chemotherapy. In Wuhan, China, 1% of patients with severe acute respiratory syndrome coronavirus 2 (SARS-CoV-2) were reported to suffer from cancer, which is more than three times the incidence of cancer in the Chinese population in 2015 [2]. In addition, in 39% of cancer patients (compared with 8% of patients without cancer), transfer to the intensive care unit was necessary, with their illness deteriorating more rapidly (13 *versus* 43 days to severe event) [2]. Chemotherapy or surgery <1 month before was an important risk factor (OR 5.34,  $p=0.0026$ ).
